# Supplementary material
Source: PubMed Central journal article supplement (PMC4617627)
Supplement: NIHMS616141-supplement-supplement_1.pdf [file NIHMS616141-supplement-supplement_1.pdf]

by Oct4 were differentiated *in vitro* into definitive endoderm (DE, yellow) marked by Sox17 and subsequently to pancreatic progenitors (PP, green), marked by the expression of Pdx1 and NKX6.1. The cells were transplanted into SCID-beige mice to complete maturation *in vivo*. (**K, L**) Immunostaining for Ucn3 (green) and insulin (red) on the *in vitro* differentiated cells shown at two magnifications (K, low magnification; L, high magnification). *In vivo* differentiated (transplanted) cells are shown in (**M**). Nuclei are stained with DAPI (blue). Scale bars = 50 $\mu$ m. Ucn3 is expressed in the *in vivo* matured cells, but not in *in vitro* differentiated insulin-positive  $\beta$ -like cells.

**Supplementary Figure 1: Ucn3 expression in mouse islets is restricted to  $\beta$ -cells.**

(**A-C**) Confocal images showing immunostaining of Ucn3 (green) and glucagon (red) on adult mouse pancreatic sections. (**D-F**) Ucn3 (green) and somatostatin (red) (**G-I**) Ucn3 (green) and pancreatic polypeptide (PPY, red). Nuclei are stained with DAPI (blue). Scale bars = 50 $\mu$ m. No co-localization of Ucn3 is seen with any of the islet hormones (other than insulin – see Fig 2 and 3).

**Supplementary Figure 2: Ucn3 expression levels increase gradually in all  $\beta$ -cells during maturation, whereas insulin content stays constant.**

Intra-cellular FACS analysis of insulin and Ucn3 in E18.5 (blue), P6 (green) and P13 (red). Histograms present the signal intensity of Ucn3 (A) and insulin (B) plotted against the percentage of all insulin expressing cells. Numbers in brackets show mean intensity  $\pm$  sem of three independent biological repeats (three separate litters) for each age group.

### **Supplementary Figure 3: Ucn3 expression in human pancreas**

(A-C) Confocal images showing immunostaining of Ucn3 (green) and insulin (red) on pancreatic sections from an adult human. (D-F) Ucn3 (green) and glucagon (red). (G-I) Ucn3 (green) and somatostatin (red) (J-L) Ucn3 (green) and pancreatic polypeptide (PPY, red). Nuclei are stained with DAPI (blue). Scale bars = 50µm.

### **Supplementary Figure 4: HESC-derived $\beta$ -cells secrete human C-peptide in response to glucose challenge**

Mice transplanted with 5 million HESC-derived pancreatic progenitors were fasted 12 weeks after transplantation over night and injected with 2mg/kg glucose. The levels of human C-peptide before (fasting, blue) and one hour after glucose administration (glucose, red) are shown. Despite variable basal levels of human C-peptide, all animals except mouse #4, showed glucose-stimulated secretion of human C-peptide.

### **Supplementary Figure 5: Ucn3 expression in HESC-derived $\beta$ -cells after maturation *in vivo***

(A-C) Confocal images showing immunostaining of Ucn3 (green) and insulin (red) on HESC-derived graft 8 months post transplantation. (D-F) Ucn3 (green) and glucagon (red). (G-I) Ucn3 (green) and somatostatin (red) (J-L) Ucn3 (green) and pancreatic polypeptide (PPY, red). Nuclei are stained with DAPI (blue). Scale bars = 50µm.

### **Supplementary Table 1**

List of genes differentially expressed between immature (E18.5 and P1) and mature (P10 and adult)  $\beta$ -cells. Numbers represent normalized expression levels in the microarray  $\pm$  standard deviation. Asterisks mark acinar-related genes. Underlined genes were chosen for analysis at the protein levels.

# Supplementary Figure 1

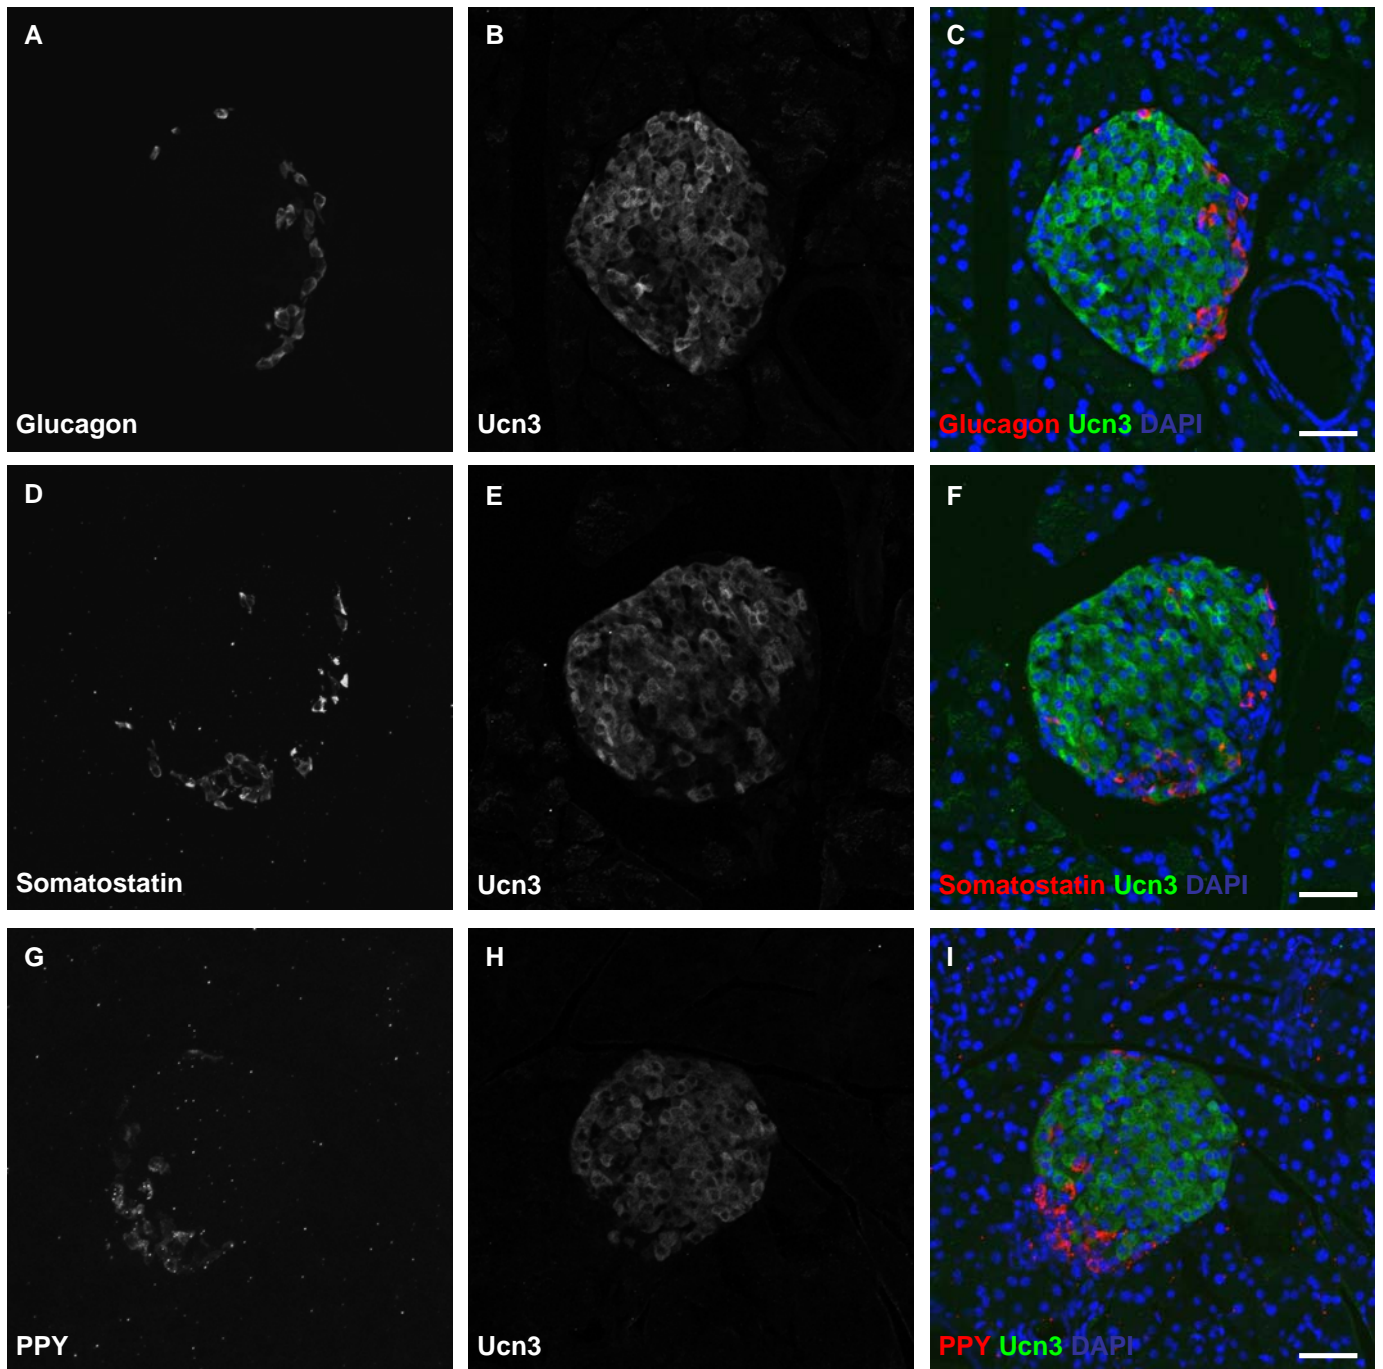

### Ucn3

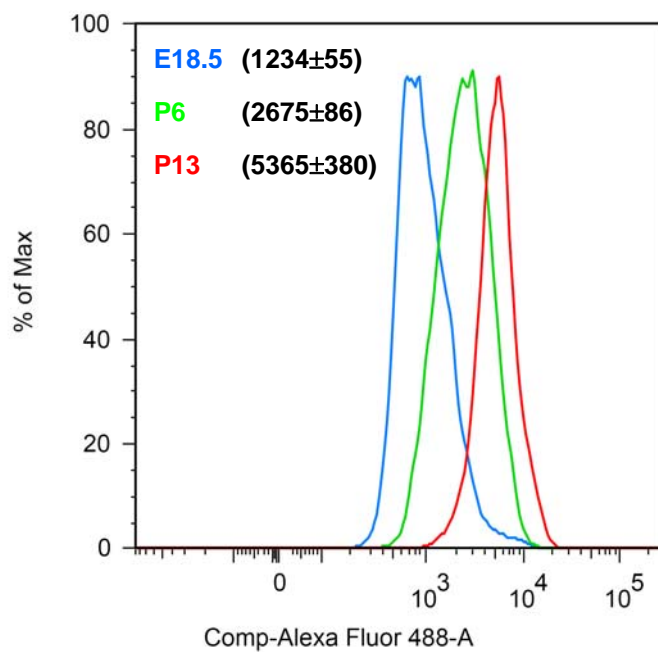

### Insulin

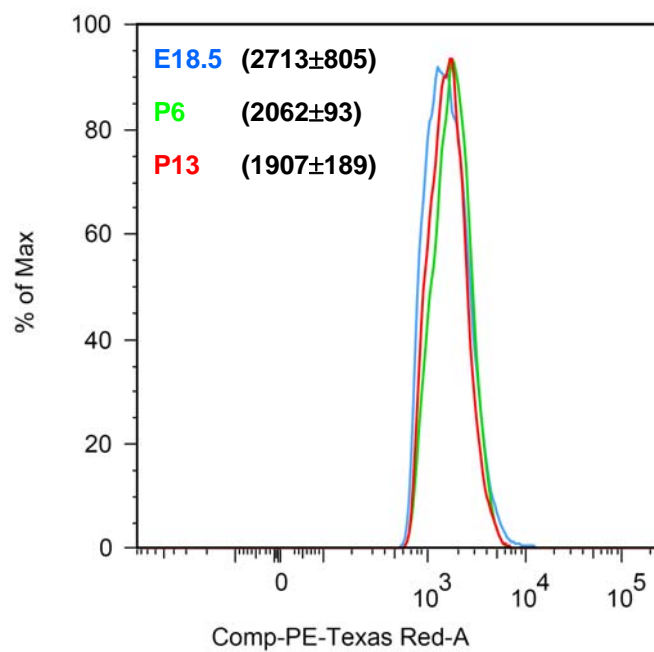

————— Signal intensity —————→

Supplementary Figure 3

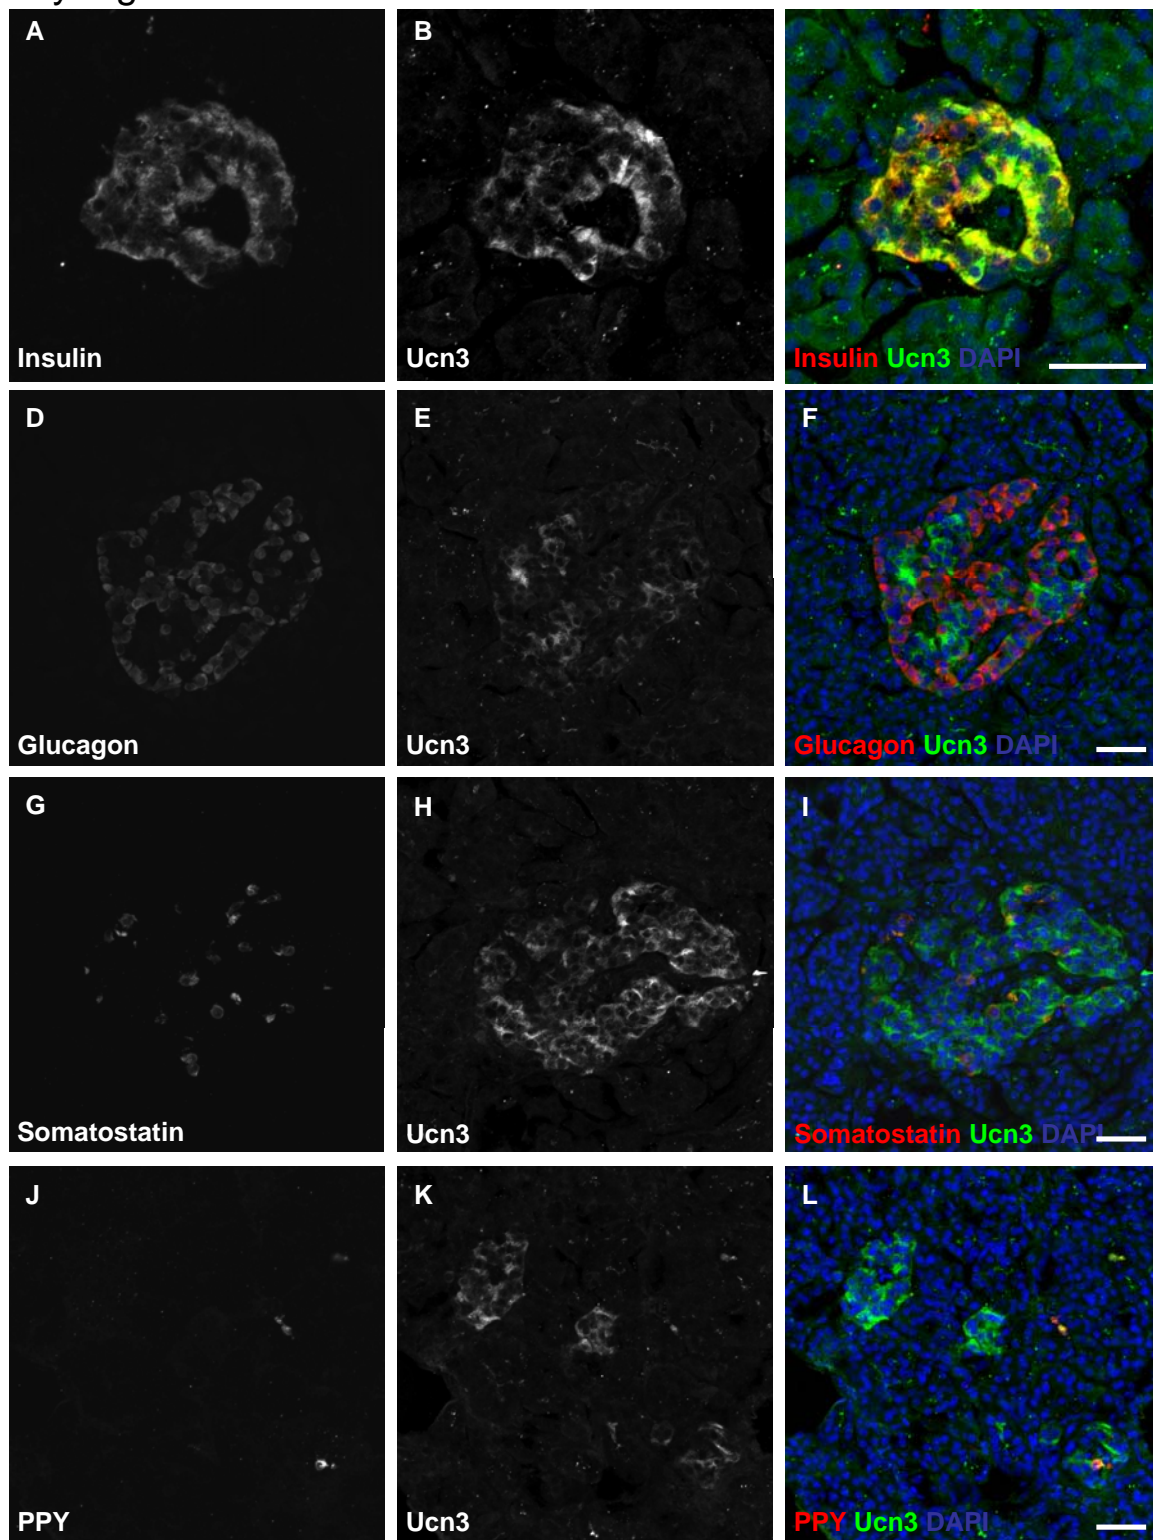

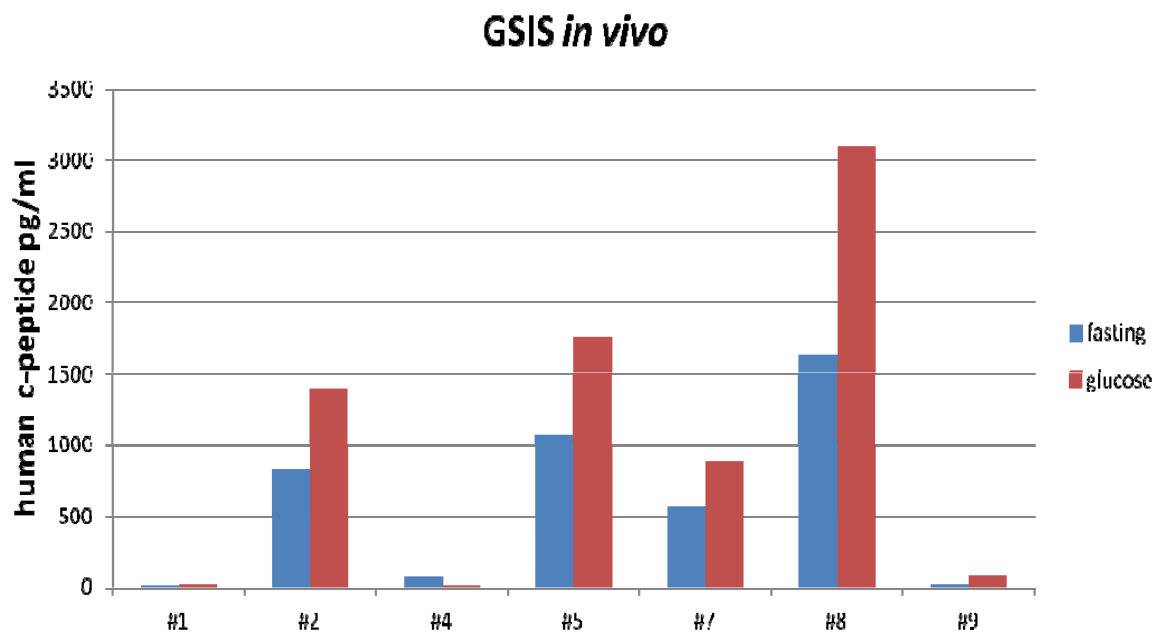

Supplementary Figure 5

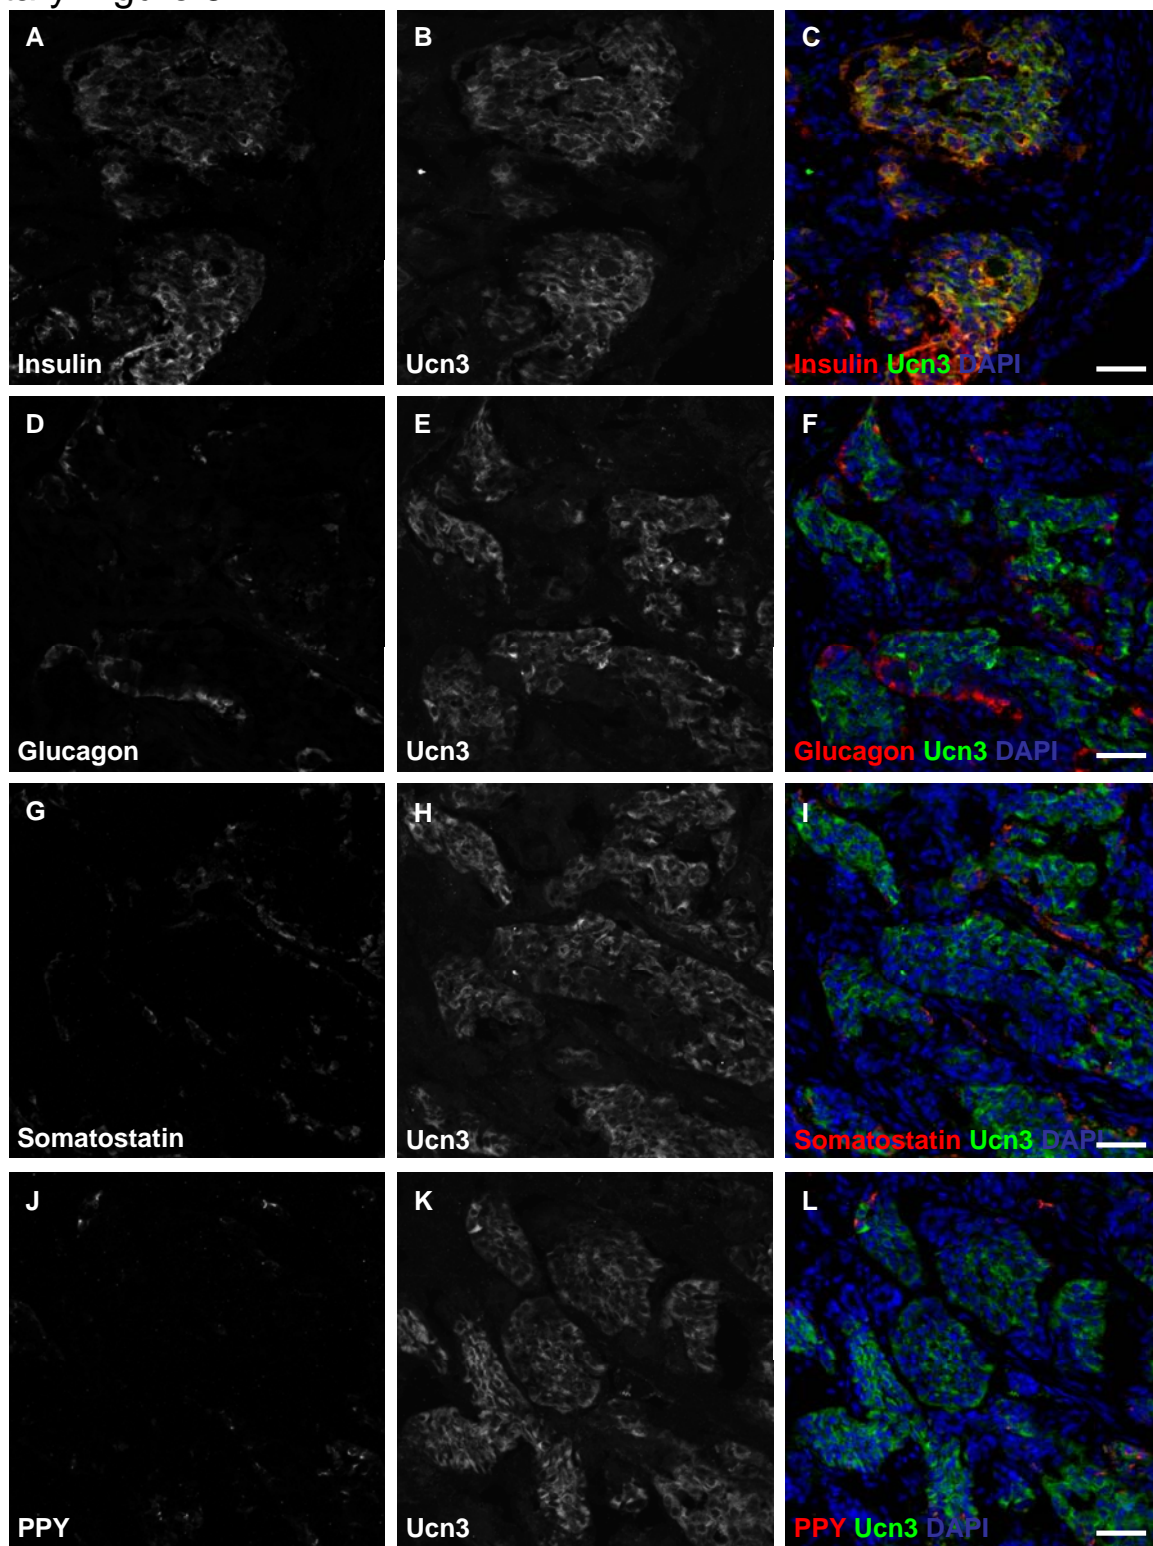



Supplementary table 1

## Up regulated genes

| PROBE_ID     | Gene symbol           | E18.5     | P1        | P10         | Adult        | Fold change |
|--------------|-----------------------|-----------|-----------|-------------|--------------|-------------|
| ILMN_2673260 | <i>Ctrl*</i>          | 49 ± 8    | 69 ± 30   | 2269 ± 2057 | 3110 ± 1910  | 59.1        |
| ILMN_2881083 | <i>Try10*</i>         | 65 ± 29   | 300 ± 312 | 4572 ± 3844 | 7237 ± 4442  | 39.7        |
| ILMN_2716989 | <i>Prss2*</i>         | 46 ± 6    | 81 ± 54   | 1663 ± 1192 | 2392 ± 1334  | 39.4        |
| ILMN_3160208 | <i>Cpb1*</i>          | 48 ± 17   | 83 ± 51   | 1627 ± 1322 | 2169 ± 1747  | 34.7        |
| ILMN_2693403 | <i>Ela1*</i>          | 88 ± 26   | 102 ± 33  | 1513 ± 758  | 5071 ± 2642  | 34.0        |
| ILMN_2666677 | <i>Cel*</i>           | 60 ± 23   | 95 ± 48   | 2100 ± 1965 | 1871 ± 1213  | 33.4        |
| ILMN_2493756 | <i>Try4*</i>          | 49 ± 14   | 156 ± 141 | 1985 ± 1574 | 3706 ± 2554  | 33.1        |
| ILMN_2728429 | <i>1810010M01Rik*</i> | 53 ± 14   | 90 ± 52   | 1051 ± 632  | 3239 ± 2226  | 31.5        |
| ILMN_2592415 | <i>Reg1*</i>          | 106 ± 71  | 202 ± 141 | 4954 ± 3212 | 3272 ± 2018  | 30.1        |
| ILMN_2671137 | <i>Ela3b*</i>         | 57 ± 27   | 125 ± 94  | 1752 ± 1573 | 2280 ± 1351  | 26.7        |
| ILMN_1220763 | <i>Rnase1*</i>        | 69 ± 38   | 128 ± 90  | 1891 ± 1290 | 3065 ± 2175  | 26.7        |
| ILMN_2670847 | <i>Cpa1*</i>          | 89 ± 38   | 107 ± 52  | 1718 ± 1287 | 2728 ± 1855  | 24.6        |
| ILMN_3104915 | <i>1810049H19Rik*</i> | 47 ± 12   | 141 ± 122 | 1493 ± 1201 | 1953 ± 1200  | 23.3        |
| ILMN_2919377 | <i>Ctrb1*</i>         | 106 ± 59  | 225 ± 203 | 3360 ± 2265 | 2670 ± 2042  | 21.2        |
| ILMN_2933478 | <i>Amy2-2*</i>        | 47 ± 9    | 83 ± 43   | 428 ± 228   | 2166 ± 1554  | 20.2        |
| ILMN_1246265 | <i>Clps*</i>          | 233 ± 182 | 467 ± 419 | 6237 ± 3526 | 6551 ± 4551  | 18.5        |
| ILMN_2963762 | <i>Try10l*</i>        | 50 ± 15   | 163 ± 155 | 1272 ± 1049 | 1887 ± 1138  | 18.5        |
| ILMN_2874291 | <i>Amy2*</i>          | 81 ± 45   | 205 ± 186 | 1080 ± 588  | 4393 ± 2661  | 18.3        |
| ILMN_1216509 | <i>Ctrc*</i>          | 40 ± 4    | 43 ± 8    | 274 ± 196   | 1084 ± 920   | 17.9        |
| ILMN_2990661 | <i>Pnliprp2*</i>      | 38 ± 5    | 47 ± 13   | 502 ± 355   | 697 ± 568    | 17.3        |
| ILMN_2722659 | <i>Clps*</i>          | 86 ± 43   | 149 ± 113 | 1829 ± 1128 | 1668 ± 1335  | 16.7        |
| ILMN_2674620 | <i>Ela2*</i>          | 253 ± 286 | 627 ± 576 | 5169 ± 3159 | 10910 ± 5518 | 16.5        |
| ILMN_1232533 | <i>Sycn*</i>          | 46 ± 12   | 72 ± 34   | 462 ± 292   | 1374 ± 1022  | 16.5        |
| ILMN_2829699 | <i>EG436523*</i>      | 51 ± 24   | 167 ± 160 | 1127 ± 957  | 1320 ± 996   | 14.1        |
| ILMN_2708477 | <i>Spink3*</i>        | 52 ± 13   | 98 ± 76   | 993 ± 641   | 529 ± 383    | 13.3        |
| ILMN_2760199 | <i>Klk6</i>           | 57 ± 13   | 74 ± 23   | 564 ± 384   | 829 ± 609    | 12.3        |
| ILMN_2904435 | <i>Gp2*</i>           | 37 ± 1    | 41 ± 7    | 181 ± 80    | 622 ± 493    | 11.2        |
| ILMN_1225909 | <i>Pnliprp1*</i>      | 451 ± 380 | 774 ± 664 | 8347 ± 1724 | 4806 ± 2403  | 9.3         |

Up regulated genes (cont.)

| PROBE_ID     | Gene symbol           | E18.5     | P1         | P10         | Adult       | Fold change |
|--------------|-----------------------|-----------|------------|-------------|-------------|-------------|
| ILMN_2844820 | <i>Angptl7</i>        | 68 ± 4    | 105 ± 16   | 383 ± 125   | 1043 ± 151  | 8.8         |
| ILMN_1216566 | <i>LOC232680*</i>     | 61 ± 9    | 64 ± 13    | 452 ± 198   | 447 ± 349   | 8.2         |
| ILMN_2731191 | <i>Klk5*</i>          | 46 ± 4    | 49 ± 10    | 238 ± 157   | 343 ± 269   | 7.5         |
| ILMN_2684115 | <i>2210010C04Rik*</i> | 37 ± 2    | 48 ± 13    | 201 ± 147   | 297 ± 184   | 7.4         |
| ILMN_1238143 | <b><i>Ucn3</i></b>    | 127 ± 20  | 154 ± 13   | 923 ± 22    | 1234 ± 285  | 7.2         |
| ILMN_2690014 | <i>Syt4</i>           | 80 ± 4    | 62 ± 5     | 252 ± 22    | 734 ± 107   | 6.9         |
| ILMN_2692167 | <i>Pnliprp2*</i>      | 40 ± 2    | 43 ± 7     | 176 ± 130   | 264 ± 205   | 6.7         |
| ILMN_1226556 | <i>2310032F03Rik*</i> | 44 ± 3    | 47 ± 4     | 172 ± 15    | 435 ± 207   | 6.6         |
| ILMN_2860932 | <i>Zbtb2*</i>         | 91 ± 13   | 76 ± 9     | 348 ± 211   | 629 ± 600   | 6.6         |
| ILMN_1259215 | <i>Serpina10</i>      | 136 ± 10  | 97 ± 25    | 275 ± 18    | 1303 ± 13   | 6.6         |
| ILMN_1252131 | <i>Klk1b27</i>        | 44 ± 5    | 52 ± 13    | 193 ± 151   | 270 ± 216   | 6.1         |
| ILMN_1228211 | <i>Tff2</i>           | 95 ± 3    | 81 ± 17    | 409 ± 215   | 446 ± 334   | 6.0         |
| ILMN_1238736 | <i>Klk1b4</i>         | 50 ± 3    | 58 ± 15    | 211 ± 141   | 308 ± 225   | 5.9         |
| ILMN_1231724 | <i>Resp18</i>         | 577 ± 54  | 684 ± 113  | 2693 ± 221  | 4401 ± 528  | 5.6         |
| ILMN_2850077 | <i>Adh1</i>           | 159 ± 21  | 195 ± 18   | 654 ± 25    | 1232 ± 221  | 5.1         |
| ILMN_2824971 | <i>Gpr158*</i>        | 149 ± 7   | 163 ± 25   | 617 ± 88    | 900 ± 134   | 5.0         |
| ILMN_2592718 | <i>Cuzd1*</i>         | 39 ± 4    | 39 ± 2     | 104 ± 58    | 235 ± 167   | 4.9         |
| ILMN_1258501 | <i>Adh1</i>           | 141 ± 23  | 161 ± 7    | 555 ± 19    | 999 ± 242   | 4.8         |
| ILMN_2871660 | <i>Car15</i>          | 52 ± 4    | 55 ± 1     | 364 ± 35    | 120 ± 45    | 4.7         |
| ILMN_2968692 | <i>Cpa2</i>           | 41 ± 5    | 44 ± 3     | 164 ± 80    | 152 ± 94    | 4.4         |
| ILMN_2960700 | <i>Prf1</i>           | 277 ± 43  | 249 ± 43   | 821 ± 302   | 1281 ± 918  | 4.2         |
| ILMN_2804685 | <i>Defb1</i>          | 69 ± 6    | 133 ± 42   | 319 ± 19    | 536 ± 126   | 4.2         |
| ILMN_2596522 | <i>Mt1*</i>           | 958 ± 521 | 1348 ± 109 | 2719 ± 1045 | 7849 ± 4383 | 4.1         |
| ILMN_2822825 | <i>Fbxo2</i>          | 90 ± 1    | 111 ± 24   | 314 ± 50    | 401 ± 27    | 3.8         |
| ILMN_2695819 | <i>Ddit4l</i>         | 49 ± 4    | 50 ± 4     | 168 ± 51    | 149 ± 46    | 3.6         |
| ILMN_2728038 | <i>Arhgap24</i>       | 139 ± 16  | 128 ± 28   | 348 ± 33    | 595 ± 215   | 3.4         |
| ILMN_2648742 | <i>Abcb4</i>          | 78 ± 20   | 90 ± 19    | 266 ± 14    | 362 ± 46    | 3.4         |
| ILMN_2839027 | <i>Tceal6</i>         | 95 ± 9    | 102 ± 21   | 238 ± 10    | 447 ± 41    | 3.4         |
| ILMN_2994299 | <i>Hgfac</i>          | 182 ± 43  | 243 ± 18   | 547 ± 46    | 965 ± 91    | 3.3         |

Up regulated genes (cont.)

| PROBE_ID     | Gene symbol          | E18.5      | P1         | P10         | Adult       | Fold change |
|--------------|----------------------|------------|------------|-------------|-------------|-------------|
| ILMN_2628647 | <i>Ddc</i>           | 560 ± 97   | 553 ± 76   | 1408 ± 133  | 2434 ± 256  | 3.3         |
| ILMN_3064283 | <i>Pde4dip</i>       | 115 ± 3    | 93 ± 17    | 245 ± 7     | 433 ± 45    | 3.3         |
| ILMN_2681232 | <i>D12Ert647e</i>    | 216 ± 19   | 218 ± 20   | 492 ± 31    | 931 ± 203   | 3.2         |
| ILMN_1254335 | <i>Rgpr</i>          | 50 ± 3     | 47 ± 4     | 112 ± 13    | 194 ± 27    | 3.2         |
| ILMN_3108770 | <i>Fbxl10</i>        | 117 ± 18   | 116 ± 19   | 309 ± 1     | 489 ± 51    | 3.2         |
| ILMN_1250689 | <i>Rgs9</i>          | 133 ± 27   | 107 ± 14   | 361 ± 22    | 456 ± 49    | 3.1         |
| ILMN_2624854 | <i>Gstm2</i>         | 146 ± 23   | 140 ± 28   | 316 ± 36    | 603 ± 61    | 3.1         |
| ILMN_1251449 | <i>Gstm2</i>         | 144 ± 21   | 126 ± 11   | 303 ± 16    | 578 ± 64    | 3.1         |
| ILMN_2601471 | <i>Ccnd1</i>         | 177 ± 64   | 196 ± 13   | 473 ± 92    | 763 ± 165   | 3.0         |
| ILMN_2959272 | <i>Rnu6</i>          | 669 ± 62   | 511 ± 128  | 1627 ± 739  | 1383 ± 630  | 3.0         |
| ILMN_3162403 | <i>St6galnac3</i>    | 70 ± 4     | 79 ± 13    | 175 ± 3     | 280 ± 14    | 3.0         |
| ILMN_2647234 | <i>Dio1</i>          | 62 ± 9     | 65 ± 7     | 135 ± 13    | 248 ± 98    | 2.9         |
| ILMN_3125606 | <i>D12Ert647e</i>    | 215 ± 22   | 214 ± 2    | 449 ± 29    | 800 ± 78    | 2.8         |
| ILMN_2856567 | <i>Ppy</i>           | 1597 ± 704 | 2056 ± 957 | 5681 ± 1998 | 4387 ± 3417 | 2.8         |
| ILMN_2966162 | <i>Tmem56</i>        | 88 ± 8     | 74 ± 20    | 188 ± 17    | 266 ± 91    | 2.8         |
| ILMN_1217118 | <i>Enpp5</i>         | 280 ± 46   | 281 ± 19   | 587 ± 2     | 1071 ± 343  | 2.7         |
| ILMN_1221503 | <i>Ccnd1</i>         | 206 ± 81   | 207 ± 21   | 466 ± 97    | 788 ± 134   | 2.7         |
| ILMN_2862470 | <i>Gstm2</i>         | 81 ± 11    | 77 ± 12    | 163 ± 0     | 270 ± 21    | 2.6         |
| ILMN_2646640 | <i>1700019D03Rik</i> | 84 ± 7     | 91 ± 18    | 185 ± 2     | 278 ± 53    | 2.6         |
| ILMN_2615096 | <i>Dpp4</i>          | 119 ± 20   | 106 ± 17   | 312 ± 0     | 306 ± 19    | 2.5         |
| ILMN_2652757 | <i>Elovl5</i>        | 501 ± 20   | 510 ± 89   | 1153 ± 120  | 1247 ± 103  | 2.4         |
| ILMN_2722996 | <i>Ptpns1</i>        | 407 ± 77   | 424 ± 89   | 883 ± 13    | 1240 ± 203  | 2.4         |
| ILMN_2731769 | <i>Plekhh2</i>       | 149 ± 20   | 161 ± 24   | 341 ± 35    | 365 ± 60    | 2.2         |
| ILMN_2652414 | <i>Ncald</i>         | 146 ± 13   | 141 ± 23   | 312 ± 12    | 337 ± 31    | 2.2         |

**Down regulated genes**

| PROBE_ID     | Gene symbol    | E18.5 |       | P1   |       | P10  |       | Adult |       | Fold change |
|--------------|----------------|-------|-------|------|-------|------|-------|-------|-------|-------------|
| ILMN_1244618 | <i>Dlk1</i>    | 2028  | ± 195 | 2051 | ± 315 | 126  | ± 18  | 39    | ± 1   | -23.3       |
| ILMN_2946520 | <i>Npy</i>     | 3464  | ± 545 | 2001 | ± 551 | 235  | ± 25  | 77    | ± 38  | -17.8       |
| ILMN_2643658 | <i>Ghrl</i>    | 1199  | ± 617 | 643  | ± 205 | 77   | ± 27  | 40    | ± 4   | -17.1       |
| ILMN_2755578 | <i>Nnat</i>    | 1677  | ± 588 | 1286 | ± 499 | 257  | ± 79  | 69    | ± 17  | -8.8        |
| ILMN_2649773 | <i>Slc38a5</i> | 7037  | ± 586 | 5761 | ± 660 | 1181 | ± 68  | 421   | ± 122 | -8.0        |
| ILMN_1232456 | <i>Nnat</i>    | 593   | ± 146 | 448  | ± 102 | 98   | ± 28  | 42    | ± 2   | -7.1        |
| ILMN_2598022 | <i>Ghrl</i>    | 337   | ± 147 | 173  | ± 38  | 50   | ± 2   | 43    | ± 2   | -6.9        |
| ILMN_2518412 | <i>Grb10</i>   | 1459  | ± 160 | 933  | ± 133 | 246  | ± 11  | 155   | ± 50  | -6.2        |
| ILMN_2635700 | <i>Lgi2</i>    | 823   | ± 136 | 833  | ± 113 | 131  | ± 10  | 166   | ± 63  | -5.8        |
| ILMN_1251414 | <i>Nxf</i>     | 525   | ± 159 | 510  | ± 141 | 89   | ± 27  | 94    | ± 48  | -5.7        |
| ILMN_2643049 | <i>Chst8</i>   | 419   | ± 65  | 611  | ± 109 | 113  | ± 16  | 64    | ± 7   | -5.7        |
| ILMN_2842601 | <i>Gp9</i>     | 356   | ± 64  | 240  | ± 49  | 62   | ± 15  | 48    | ± 3   | -5.3        |
| ILMN_1215713 | <i>Egr4</i>    | 514   | ± 250 | 434  | ± 157 | 130  | ± 51  | 46    | ± 4   | -5.3        |
| ILMN_2597769 | <i>Igf2</i>    | 1412  | ± 843 | 852  | ± 433 | 302  | ± 106 | 232   | ± 92  | -4.9        |
| ILMN_2906728 | <i>H19</i>     | 239   | ± 186 | 122  | ± 107 | 54   | ± 18  | 41    | ± 2   | -4.8        |
| ILMN_2629519 | <i>Cryba2</i>  | 4385  | ± 749 | 4145 | ± 949 | 1153 | ± 153 | 624   | ± 50  | -4.8        |
| ILMN_2623983 | <i>Egr2</i>    | 247   | ± 110 | 186  | ± 96  | 63   | ± 10  | 45    | ± 5   | -4.6        |
| ILMN_2597827 | <i>Arc</i>     | 321   | ± 147 | 288  | ± 91  | 90   | ± 29  | 46    | ± 8   | -4.6        |
| ILMN_2619408 | <i>Atf3</i>    | 198   | ± 110 | 115  | ± 55  | 47   | ± 6   | 43    | ± 4   | -4.4        |
| ILMN_2734712 | <i>Ptpla</i>   | 551   | ± 81  | 372  | ± 48  | 139  | ± 5   | 87    | ± 13  | -4.3        |
| ILMN_2708203 | <i>Cdkn1c</i>  | 262   | ± 67  | 203  | ± 34  | 67   | ± 2   | 55    | ± 3   | -4.3        |
| ILMN_1250438 | <i>Mlp</i>     | 233   | ± 41  | 190  | ± 64  | 59   | ± 7   | 47    | ± 1   | -4.1        |
| ILMN_2592834 | <i>Sct</i>     | 274   | ± 35  | 177  | ± 23  | 68   | ± 3   | 49    | ± 3   | -4.0        |
| ILMN_1218913 | <i>Igf2bp3</i> | 307   | ± 30  | 254  | ± 45  | 94   | ± 15  | 39    | ± 1   | -4.0        |
| ILMN_2834379 | <i>Tgfb1</i>   | 175   | ± 30  | 155  | ± 8   | 47   | ± 5   | 41    | ± 4   | -3.9        |
| ILMN_2745551 | <i>Olfml2b</i> | 228   | ± 23  | 133  | ± 38  | 45   | ± 6   | 48    | ± 5   | -3.8        |
| ILMN_2687661 | <i>Mfng</i>    | 385   | ± 25  | 427  | ± 76  | 157  | ± 29  | 41    | ± 9   | -3.7        |
| ILMN_2945030 | <i>Col9a2</i>  | 258   | ± 18  | 218  | ± 30  | 82   | ± 4   | 52    | ± 2   | -3.6        |

**Down regulated genes (cont.)**

| <b>PROBE_ID</b> | <b>Gene symbol</b>   | <b>E18.5</b> | <b>P1</b>  | <b>P10</b> | <b>Adult</b> | <b>Fold change</b> |
|-----------------|----------------------|--------------|------------|------------|--------------|--------------------|
| ILMN_2981542    | <i>Mfap2</i>         | 189 ± 53     | 171 ± 50   | 59 ± 4     | 51 ± 8       | -3.6               |
| ILMN_2771237    | <i>Lbp</i>           | 161 ± 119    | 251 ± 167  | 70 ± 4     | 74 ± 45      | -3.6               |
| ILMN_1226175    | <i>Igf2bp3</i>       | 255 ± 16     | 187 ± 25   | 85 ± 4     | 39 ± 4       | -3.6               |
| ILMN_2718330    | <i>Cish</i>          | 1136 ± 211   | 1235 ± 112 | 421 ± 78   | 226 ± 92     | -3.6               |
| ILMN_2747543    | <i>Actn3</i>         | 192 ± 23     | 217 ± 37   | 66 ± 4     | 52 ± 4       | -3.5               |
| ILMN_1221750    | <i>Lmyc1</i>         | 193 ± 18     | 216 ± 22   | 73 ± 9     | 39 ± 1       | -3.5               |
| ILMN_2900653    | <i>Gadd45b</i>       | 396 ± 125    | 306 ± 38   | 105 ± 50   | 87 ± 18      | -3.4               |
| ILMN_2636403    | <i>Axud1</i>         | 248 ± 155    | 169 ± 23   | 84 ± 11    | 75 ± 19      | -3.4               |
| ILMN_1244169    | <i>Sftpd</i>         | 244 ± 32     | 258 ± 55   | 87 ± 6     | 66 ± 8       | -3.4               |
| ILMN_1222084    | <i>Rem2</i>          | 564 ± 60     | 634 ± 197  | 229 ± 47   | 112 ± 47     | -3.2               |
| ILMN_1225764    | <i>1700018O18Rik</i> | 133 ± 18     | 150 ± 11   | 47 ± 4     | 43 ± 5       | -3.2               |
| ILMN_2828112    | <i>Igfbpl1</i>       | 134 ± 12     | 106 ± 8    | 38 ± 2     | 38 ± 2       | -3.2               |
| ILMN_2776034    | <i>Gal</i>           | 202 ± 18     | 185 ± 20   | 48 ± 5     | 75 ± 19      | -3.2               |
| ILMN_2445324    | <i>Zfpm1</i>         | 426 ± 58     | 489 ± 80   | 205 ± 3    | 105 ± 22     | -3.1               |
| ILMN_2941790    | <i>Cldn6</i>         | 433 ± 86     | 344 ± 39   | 148 ± 9    | 123 ± 45     | -3.1               |
| ILMN_2736478    | <i>Doc2b</i>         | 187 ± 25     | 134 ± 52   | 63 ± 3     | 47 ± 2       | -3.1               |
| ILMN_2930602    | <i>Doc2b</i>         | 176 ± 39     | 114 ± 54   | 57 ± 7     | 44 ± 4       | -3.0               |
| ILMN_1246201    | <i>Cacna1h</i>       | 218 ± 44     | 141 ± 54   | 62 ± 3     | 68 ± 21      | -3.0               |
| ILMN_2514292    | <i>Zyx</i>           | 355 ± 86     | 264 ± 64   | 108 ± 16   | 112 ± 20     | -3.0               |
| ILMN_2678714    | <i>ldb4</i>          | 195 ± 28     | 195 ± 30   | 84 ± 14    | 43 ± 1       | -3.0               |
| ILMN_2638324    | <i>Gnas</i>          | 105 ± 34     | 121 ± 13   | 45 ± 4     | 40 ± 6       | -2.9               |
| ILMN_2700608    | <i>Stx1a</i>         | 310 ± 45     | 341 ± 16   | 138 ± 12   | 93 ± 15      | -2.9               |
| ILMN_2718217    | <i>2310057H16Rik</i> | 248 ± 58     | 195 ± 36   | 91 ± 3     | 80 ± 5       | -2.9               |
| ILMN_2715546    | <i>Gpx3</i>          | 3096 ± 199   | 3125 ± 456 | 1018 ± 207 | 1034 ± 229   | -2.8               |
| ILMN_2731407    | <i>Gdf3</i>          | 131 ± 23     | 108 ± 15   | 44 ± 1     | 48 ± 6       | -2.8               |
| ILMN_1240857    | <i>Cox7a1</i>        | 149 ± 26     | 128 ± 28   | 58 ± 3     | 46 ± 5       | -2.8               |
| ILMN_2714031    | <i>1300002F13Rik</i> | 716 ± 184    | 576 ± 164  | 278 ± 3    | 246 ± 42     | -2.8               |
| ILMN_1256702    | <i>S100a10</i>       | 574 ± 73     | 455 ± 94   | 157 ± 36   | 200 ± 72     | -2.8               |
| ILMN_2756704    | <i>9130213B05Rik</i> | 195 ± 32     | 161 ± 27   | 78 ± 1     | 61 ± 4       | -2.8               |

**Down regulated genes (cont.)**

| <b>PROBE_ID</b> | <b>Gene symbol</b>   | <b>E18.5</b> | <b>P1</b>  | <b>P10</b> | <b>Adult</b> | <b>Fold change</b> |
|-----------------|----------------------|--------------|------------|------------|--------------|--------------------|
| ILMN_2728379    | <i>Ivd</i>           | 852 ± 99     | 1010 ± 106 | 368 ± 11   | 325 ± 51     | -2.8               |
| ILMN_2604029    | <i>Klf2</i>          | 252 ± 98     | 187 ± 63   | 89 ± 42    | 66 ± 16      | -2.7               |
| ILMN_2632206    | <i>Gnas</i>          | 1494 ± 455   | 1575 ± 250 | 708 ± 41   | 609 ± 135    | -2.6               |
| ILMN_2731949    | <i>Copeb</i>         | 273 ± 86     | 238 ± 81   | 108 ± 33   | 91 ± 33      | -2.6               |
| ILMN_2430220    | <i>Tmem2</i>         | 174 ± 34     | 164 ± 16   | 77 ± 5     | 65 ± 6       | -2.5               |
| ILMN_1248740    | <i>Sema3f</i>        | 138 ± 31     | 123 ± 25   | 60 ± 7     | 49 ± 6       | -2.5               |
| ILMN_2766651    | <i>Mafb</i>          | 115 ± 11     | 104 ± 33   | 47 ± 3     | 41 ± 2       | -2.5               |
| ILMN_3008110    | <i>Actn3</i>         | 136 ± 15     | 141 ± 22   | 64 ± 2     | 57 ± 5       | -2.4               |
| ILMN_2735184    | <i>Col18a1</i>       | 259 ± 79     | 210 ± 61   | 92 ± 56    | 86 ± 6       | -2.4               |
| ILMN_2996683    | <i>Pvrl2</i>         | 376 ± 21     | 320 ± 43   | 159 ± 16   | 134 ± 34     | -2.3               |
| ILMN_2697361    | <i>B930096L08Rik</i> | 121 ± 16     | 120 ± 21   | 60 ± 6     | 47 ± 5       | -2.3               |
| ILMN_2745614    | <i>1810015C04Rik</i> | 278 ± 37     | 248 ± 94   | 122 ± 4    | 122 ± 33     | -2.3               |
| ILMN_3133448    | <i>Mfge8</i>         | 412 ± 138    | 409 ± 52   | 165 ± 87   | 195 ± 77     | -2.1               |
| ILMN_2646625    | <i>Jun</i>           | 456 ± 106    | 460 ± 158  | 220 ± 74   | 196 ± 90     | -2.1               |
| ILMN_2696299    | <i>D5Erd579e</i>     | 509 ± 27     | 523 ± 128  | 245 ± 50   | 245 ± 51     | -2.0               |
